# Supplementary material for: A Case Report of a Patient on Therapeutic Warfarin Who Died of COVID-19 Infection with a Sudden Rise in D-Dimer
Source: MDPI journal article supplement (doi:10.3390/biomedicines9101382), 2021-10-03
Supplement: s1 [file s1]

# Supplementary Tables

**Table S1.** Past medical history.

| Past Medical History                                             |
|------------------------------------------------------------------|
| Hypertension                                                     |
| Hyperlipidemia                                                   |
| Mild Coronary Artery disease managed by lifestyle changes 2017   |
| Cardiomyopathy 2017 (EF <40%) Managed by lifestyle changes       |
| Diabetes hga1c 6.2                                               |
| h/o bilateral PE (Pulmonary embolism) provoked DVT (injury) 2013 |
| Recurrent saddle PE 2015 on lifetime warfarin                    |
| Provoked DVT from injury 2013                                    |
| Anemia, low folate                                               |
| Intermittent elevated LFT-fatty liver                            |
| Pelvo-abdominal horse-shoe kidney                                |
| Hep B immune from exposure                                       |
| Osteoarthritis spondylolisthesis spine                           |
| Left leg injury from tree 2013                                   |
| Benign Prostate Hyperplasia                                      |
| Mild Chronic Obstructive Pulmonary Disease                       |
| Low vitamin D                                                    |
| Social History                                                   |
| Tobacco remission                                                |
| Alcohol intermittent                                             |
| Drugs Denied                                                     |

PE: Pulmonary embolism; DVT: Deep Vein Thrombosis; LFT Liver function Tests; Hep B: Hepatitis B.

**Table S2.** Home medication list.

| List Of Medicines at Home                                                                                                                                                                              | Status |
|--------------------------------------------------------------------------------------------------------------------------------------------------------------------------------------------------------|--------|
| 1. ACCU-Chek guide (glucose) Test strip use: 1 Strip for testing as directed to test the blood glucose                                                                                                 |        |
| 2. Accu-chek guide(glucose) Hi/Lo control solution: 1 drop directed to test Accu-Chek guide machine                                                                                                    |        |
| 3. Atenolol 100 mg tab; take one tablet by mouth every morning for blood pressure. *new dose*                                                                                                          |        |
| 4. Insulin, glargine, human solostar 3ml pen inject 22 units under the skin at bedtime discard pen 28 days after opening.                                                                              |        |
| 5. Losartan 100 mg tab take one tablet by mouth every day for blood pressure.                                                                                                                          |        |
| 6. Needle, pen 31 g, 5 mm use one needle under the skin each day. Use with insulin pen.                                                                                                                |        |
| 7. Rosuvastatin CA 40 mg tab take one-half tablet by mouth every day for cholesterol replacement atorvastatin.                                                                                         |        |
| 8. Warfarin NA (Teva) 5 mg tab; take one tablet by mouth on Monday, Wednesday, and Friday and take one and one-half tablets all other days. Take at the same time every day to prevent blood clotting. |        |
| 9. Terazosin 4 mg QHS                                                                                                                                                                                  |        |
| Dulaglutide 1.5 mg/0.5 ml injection pen                                                                                                                                                                |        |
| Inject 1.5 mg/0.5 ml under the skin once a week                                                                                                                                                        |        |
| Rx# 9289630 last released: 8/26/20, qty/days supply: 12/84                                                                                                                                             |        |
| Rx expiration date: 12/5/20, refills remaining: 0                                                                                                                                                      |        |
| 10. Hydrochlorothiazide 25mg tab                                                                                                                                                                       |        |
| Take one tablet by mouth every morning for blood pressure                                                                                                                                              |        |
| Rx# 9197923a last released: 8/27/20, qty/days supply: 90/90                                                                                                                                            |        |
| Rx expiration date: 9/24/20, refills remaining: 1                                                                                                                                                      |        |
| 11. Insulin, Glargine, Human solostar 3 ml pen                                                                                                                                                         |        |
| Inject 22 units under the skin at bedtime discard pen 28 days after opening                                                                                                                            |        |
| Rx# 9162481a last released: 9/30/20, qty/days supply: 5/60                                                                                                                                             |        |
| Rx expiration date: 8/25/21, refills remaining: 4                                                                                                                                                      |        |
| 12. MVI OTC                                                                                                                                                                                            |        |
| 13.                                                                                                                                                                                                    |        |

**Table S3.** Vitals signs in Emergency department.

| <b>Signs</b>                                    |                                                 |
|-------------------------------------------------|-------------------------------------------------|
| Temperature                                     | 97.7–98-F                                       |
| Heart Rate                                      | 87–88                                           |
| Blood pressure                                  | 201/110–140/92                                  |
| Respiration rate                                | 14–18                                           |
| O <sub>2</sub> at rest on arrival               | 91–93% Room Air                                 |
| Vitals on minimal exertion standing & few steps | 120, RR 22-24, O <sub>2</sub> sat 86%, BP 96/56 |
| Oxygen saturation                               | 2-3 L, 93–96% at rest in bed                    |

**Table S4.** Inpatient medication list.

| <b>Active inpatient medications</b> |                                                                                                                                                                                                         | <b>Status</b> |
|-------------------------------------|---------------------------------------------------------------------------------------------------------------------------------------------------------------------------------------------------------|---------------|
| 1.                                  | Aerochamber Chamber One aerochamber INHL BID for use for budesonide/formoterol                                                                                                                          | Active        |
| 2.                                  | Ascorbic Acid tab 500 mg PO TID                                                                                                                                                                         | Active        |
| 3.                                  | Atenolol tab 100 mg PO QAM                                                                                                                                                                              | Active        |
| 4.                                  | Budesonide/formoterol INHL, Oral 2 Puffs INHL Oral BID with spacer                                                                                                                                      | Active        |
| 5.                                  | Ceftriaxone injection, soln 2 gm/1 vial IVP qday mix with 20 ml ns and give ivp over 3–5min 20 ml ns and give ivp over 3–5 min                                                                          | Active        |
| 6.                                  | Cholecalciferol tab 100 mcg po qday                                                                                                                                                                     | Active        |
| 7.                                  | D-50-W Injection, Soln 50cc IV Q1H PRN. Give for the patient with glucose <70 and showing signs of severe hypoglycemia. In over 5–15 minutes.                                                           | Active        |
| 8.                                  | Dextrose 40% (glucose) gel, oral 1 tube po q1h prn Glucose < 70 and signs of mild hypoglycemia (sweating, hunger, tachycardia) then give one tube = 31 g (24 gs carbohydrates) Glucose gel              | Active        |
| 9.                                  | Dextrose 40% (glucose) gel, oral 2 tubes po q1h prn. Glucose < 70 and signs of moderate hypoglycemia (disorientation, confusion, hostility) then give two tubes = 62 g (48 g carbohydrates) Glucose gel | Active        |
| 10.                                 | Doxycycline injection, Doxycycline 100 mg in normal saline 100 ml. Infuse over 60 min ivpb Q12 h                                                                                                        | Active        |
| 11.                                 | Enoxaparin injection 90 mg/0.9 ml sq q12 h                                                                                                                                                              | Active        |
| 12.                                 | Folic acid tab 2 mg po qday                                                                                                                                                                             | Active        |
| 13.                                 | Glucagon injection 1mg/1 vial IM Q1H PRN. For glucose <70 and patients with signs of severe hypoglycemia; May be given IM, SQ, or IV.                                                                   | Active        |
| 14.                                 | Insulin human regular injection per sliding scale sq q1 h prn pre-meal bg 150–199 = 1 Unit, 200–249 = 2 Units, 250–299 = 3 Units, 300–349 = 4 Units, >349 = 6 Units and Call MD                         | Active        |
| 15.                                 | Insulin glargine human injection 35 units sq qhs. Notify MD if bg < 100 or pt changed to NPO status                                                                                                     | Active        |
| 16.                                 | Lactulose solution, Oral 30 ml PO BID hold if >1 BM                                                                                                                                                     | Active        |
| 17.                                 | Losartan tab 100 mg PO QDAY hold if SBP < 100                                                                                                                                                           | Active        |
| 18.                                 | Melatonin cap/tab 9 mg PO QHS                                                                                                                                                                           | Active        |
| 19.                                 | Message to nursing miscellaneous Accu check by nursing misc achs                                                                                                                                        | Active        |
| 20.                                 | Methylprednisolone inj, soln methylprednisolone 80 mg in NS 250 ML, 10 ml/h@0 Begin after bolus IV.                                                                                                     | Active        |
| 21.                                 | Pantoprazole Tab, EC 40 mg PO ACB                                                                                                                                                                       | Active        |
| 22.                                 | Potassium phosphate injection, solution Potassium phosphate 15 MM in D5W 100 ML infuse over 120 min 2 doses for total fo 30mm IVPB Q2H                                                                  | Active        |
| 23.                                 | Remdesivir (lyophilized) inj remdesivir (lyophilized) 100 mg in NS 250 ml infuse over 60 min for five days starting tomorrow IV Qday                                                                    | Active        |
| 24.                                 | Rosuvastatin tab 20 mg PO Qday                                                                                                                                                                          | Active        |
| 25.                                 | Senna tab 17.2 mg PO HS                                                                                                                                                                                 | Active        |
| 26.                                 | Terazosin cap,oral 4 mg PO QPM                                                                                                                                                                          | Active        |
| 27.                                 | Thiamine tab 100 mg PO Qday                                                                                                                                                                             | Active        |
| 28.                                 | Zinc sulfate cap, oral 50 mg PO Qday                                                                                                                                                                    | Active        |
